# Supplementary material for: Insights on KP4 Killer Toxin-like Proteins of Fusarium Species in Interspecific Interactions
Source: MDPI journal article supplement (doi:10.3390/jof8090968), 2022-09-16
Supplement: s1 [file s1]

**Table S3. Percentages of sequence similarities among *Fusarium* spp. KP4L proteins and with the *Ustilago maydis* KP4 (UmKP4) protein.** (A) Intraspecific variability was calculated by pairwise alignment between proteins from different isolates of the same species. (B) Interspecific variability was calculated among proteins from different species considering proteins of either all *Fusarium* spp., only species belonging to the FHBSC, or only species outside the FHBSC. (C) Intergeneric variability was calculated by pairwise alignments between the UmKP4 protein and the consensus sequence derived from the alignment of KP4L proteins from either all *Fusarium* spp., only species belonging to the FHBSC, or only species outside the FHBSC.

| <b>A</b> | Intraspecific         | KP4L-0 | KP4L-1 | KP4L-2 | KP4L-3 | KP4L-4 | KP4L-4 D1 | KP4L-4 D2 | TEF-1 |
|----------|-----------------------|--------|--------|--------|--------|--------|-----------|-----------|-------|
|          | <i>F. graminearum</i> | .      | 100    | 100    | 100    | 95     | 95        | 95        | 100   |
|          | <i>F. avenaceum</i>   | .      | 98     | 96     | 97     | 98     | 98        | 99        | 99.8  |
|          | <i>F. culmorum</i>    | .      | 100    | 100    | 100    | 100    | 100       | 100       | 99.9  |
|          | <i>F. oxysporum</i> * | .      | .      | .      | .      | 99     | 99        | 100       | 99.8  |

  

| <b>B</b> | Interspecific        | KP4L-0 | KP4L-1 | KP4L-2 | KP4L-3 | KP4L-4 | KP4L-4 D1 | KP4L-4 D2 | TEF-1 |
|----------|----------------------|--------|--------|--------|--------|--------|-----------|-----------|-------|
|          | <i>Fusarium</i> spp. | 56     | 94     | 93     | 92     | 70     | 66        | 78        | 92.8  |
|          | FHBSC                | .      | 99     | 97     | 98     | 83     | 79        | 91        | 95.4  |
|          | Outside FHBSC        | 56     | .      | .      | .      | 70     | 66        | 73        | 96.7  |

  

| <b>C</b> | Intergeneric         | KP4L-0 | KP4L-1 | KP4L-2 | KP4L-3 | KP4L-4 | KP4L-4 D1 | KP4L-4 D2 |
|----------|----------------------|--------|--------|--------|--------|--------|-----------|-----------|
|          | <i>Fusarium</i> spp. | 33     | 39     | 36     | 41     | .      | 36        | 37        |
|          | FHBSC                | .      | 39     | 36     | 41     | .      | 36        | 37        |
|          | Outside FHBSC        | 33     | 37     | 35     | 39     | .      | 30        | 32        |

\* Fo47, NRRL32931, *F. oxysporum* f. sp. *melonis*, *F. oxysporum* f. sp. *lycopersici*
