# Supplementary material for: Insights on KP4 Killer Toxin-like Proteins of Fusarium Species in Interspecific Interactions
Source: MDPI journal article supplement (doi:10.3390/jof8090968), 2022-09-16
Supplement: s1 [file s1]

**Table S1. Primer sequences used for gene expression analysis of *Fusarium graminearum* KP4L-encoding genes (5' to 3').**  
Primers selected for gene expression are shown in black color.

| Name                 | Sequence                                         | Gene          | Amplicon size |
|----------------------|--------------------------------------------------|---------------|---------------|
| ACT-F<br>ACT-R       | TCAACGCCCCCGCTTTCTA<br>GATTCTCGCTCGGCAGTGG       | <i>act</i>    | 245 bp        |
| TEF-F<br>TEF-R       | CCACGTCGACTCTGGCAAGT<br>CGGCTTTGAGCTTGTCAAGAAC   | <i>tef-1</i>  | 155 bp        |
| TUB-F<br>TUB-R       | CAAGGTCTCCGACACCGTTGT<br>GACATGACGGCAGAGACAAGGT  | <i>tub</i>    | 183 bp        |
| KP4L-1-F<br>KP4L-1-R | TCCTCACTCTCACCACCCTTCT<br>CGGGCTTGTAGTTGTTTCGC   | <i>kp4l-1</i> | 130 bp        |
| KP4L-2-F<br>KP4L-2-R | CGCTCTCGGAATCAACTGTCG<br>CTCATAGTGGCGGTCTCGTGG   | <i>kp4l-2</i> | 112 bp        |
| KP4L-3-F<br>KP4L-3-R | ACCTTCGGCTCTAGCATTGGAG<br>AGCACAGATACTGCCCTGGTTG | <i>kp4l-3</i> | 131 bp        |
| KP4L-4-F<br>KP4L-4-R | CACCCTTTTGACCCTTGCC<br>TGCTGAACCTCTTGTTGGGATCT   | <i>kp4l-4</i> | 149 bp        |
